# Supplementary material
Source: publisher site journal article supplement (https://www.dovepress.com/article/468663)
Supplement: Supplementary file 1 [file get_supplementary_file.php]

Questionnaire

**Clinical trial conducted from a humanitarian perspective**

This questionnaire is conducted to investigate the actual condition of the expanded access clinical trial that began to be conducted in accordance with the clinical trial conducted from a humanitarian perspective (Notification No. 0122-7 of the Crude Drug Safety Bureau dated January 22, 2016) and to examine the points to be improved. This questionnaire is conducted for research aimed at clarifying (1) the recognition of the expanded access clinical trial, the actual condition of the conduct, and (2) the perceptions of the conduct at the study sites and pharmaceutical companies, and the opinions on the points to be improved. Thank you for your cooperation despite your busy schedule.

**Questions regarding background information of study subjects**

1. Background information

a. Age

b. Gender

c. Career in the pharmaceutical industry

d. Jobs and titles within pharmaceutical companies

e. Diseases, and fields that pharmaceutical companies are focusing on

**General Questions on Expanded Access Clinical Trial**

1. Do you know about expanded access clinical trials?
2. Please tell us how many pivotal clinical trials you have been conducting since 2016 to date.

a. Of these, the number of drugs that have been designated to the SAKIGAKE designation system

b. Of these, the number of drugs designated as orphan drugs

c. Of these, the number of drugs requested by the authorities

d. Of these, the number of drugs subject to U.S. EPAs (Expanded Access Program)

1. Please tell us how many expanded access clinical trials you have conducted since 2016 to date.

a. Of these, the number of drugs that have been designated to the SAKIGAKE designation system

b. Of these, the number of drugs designated as orphan drugs

c. Of these, the number of drugs requested by the authorities

d. Of these, the number of drugs subject to U.S. EPAs (Expanded Access Program)

1. What are you registering with the Clinical study system? (Multiple responses are acceptable)
   1. Clinical Trial.gov　②JapicCTI　③UMIN-CTR　④Clinical Trial Registration

⑤JRCT

1. From when should the expanded access clinical trial be considered?

① Before starting the pivotal clinical trial; ② After inclusion of the pivotal clinical trial is completed; ③ After starting the pivotal clinical trial; ④ After the top-line results are published.

1. What is the basis for conducting an expanded access clinical trial?

①Because the product is subject to the SAKIGAKE designation system; ② because EAPs were conducted in the United States; ③ because the product was designated as an orphan drug; ④ because the request was received from the authorities; ⑤ because it was requested by physicians and medical institutions; ⑥ because we received a request from patients; and ⑦ others.

1. Is there any basis for it not to be conducted? If so, what is the reason?

①System applicability reason; ② Absolute reason; ③ Periodic reason; ④ Individual reason

1. You have received a request from a physician or a patient to conduct an expanded access clinical trial, but do you have experience conducting the expanded access clinical trial described in ⑤?
2. Have you ever received a request from the authorities to conduct an expanded access clinical trial, as in ⑧ above?

**General Questions on Expanded Access Clinical Trial**

1. Please tell us as much as possible about the product as outlined below.

･ Drug with new active ingredients; new indications; other

1. What is the target number of subjects in the protocol?
2. What is the age of the subjects?
3. Tell us about the subject disease.
4. From when should the expanded access clinical trial be considered?

①Before starting the pivotal clinical trial; ② After inclusion of the pivotal clinical trial is completed;　③ After starting the pivotal clinical trial

④ After the top-line result is published.

1. Please tell me the reason for the implementation.

①Because the product is subject to SAKIGAKE designation system; ② because EAPs were conducted in the United States;

③ because the drug was designated as an orphan drug; ④ because the request was received from the authorities;

⑤ because it was requested by physicians and medical institutions; ⑥ because we received a request from patients; and ⑦ others.

**Questions on the opinions on expanded access clinical trials**

1. What do you think are the points for improving the expanded access clinical trial?

① Shortening of time-to-start an expanded access clinical trial; ② provision of financial assistance; ③ Reduction of the scope of the data to be collected; ④ simplification of the procedure; ⑤ other; and ⑥ none.

In the United States, there is a system similar to the expanded access clinical trial on a single-patient basis (Single patient Investigational New Drug application) and not on a group basis. We believe that conducting an expanded access clinical trial on a single-patient basis reduces the time to commence an expanded access clinical trial and reduces the incidence of unavailability of expanded access clinical trials. The disadvantage is that the burden on institutions conducting them will increase.

1. Do you think single-patient IND should be performed in Japan as well?
2. What do you think are the advantages and disadvantages of Single patient IND?
3. Would you like to perform a Single patient IND if you have one?

Second edition (prepared on October 31, 2022)
